# Supplementary figures and images for: Fabrication and characterization of a novel PbO2 electrode with a CNT interlayer
Source: Royal Society of Chemistry journal article supplement (doi:10.1039/c6ra02857h), 2016-01-01

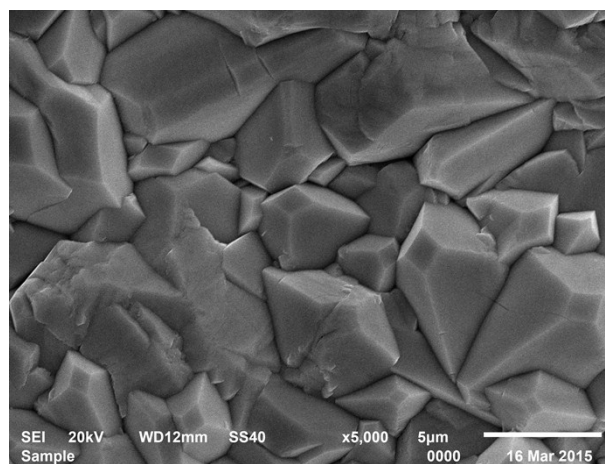

Fig. S1. SEM image of traditional electrodes.

Supplement: c6ra02857h1.pdf [file c6ra02857h1.pdf]
